# Supplementary material for: Two Ascophyllum nodosum Fucoidans with Different Molecular Weights Inhibit Inflammation via Blocking of TLR/NF-κB Signaling Pathway Discriminately
Source: MDPI journal article supplement (doi:10.3390/foods11152381), 2022-08-08
Supplement: s1 [file s1]

Two *Ascophyllum nodosum* Fucoidans with Different Molecular Weights Inhibit  
Inflammation via Blocking of TLR/NF- $\kappa$ B Signaling Pathway Discriminately

Lilong Wang<sup>1</sup>, Linlin Wang<sup>1</sup>, Chunhong Yan<sup>1</sup>, Chunqing Ai<sup>1</sup>, Chengrong Wen<sup>1</sup>, Xiaoming Guo<sup>2</sup>,  
Shuang Song<sup>1,\*</sup>

<sup>1</sup> National Engineering Research Center of Seafood, School of Food Science and Technology,  
Collaborative Innovation Center of Seafood Deep Processing, School of Food Science and  
Technology, Dalian Polytechnic University, Dalian 116034, P. R. China

<sup>2</sup> Shenzhen Key Laboratory of Food Nutrition and Health, Institute for Advanced Study, Shenzhen  
University, Shenzhen, 518060, P. R. China

\* Corresponding author at School of Food Science and Technology, Dalian Polytechnic University,  
No.1 Qinggongyuan, Ganjingzi District, Dalian 116034, P. R. China. Tel: +86-411-86323262, Fax:  
+86-411-86323262. E-mail address: songs1008@163.com.

Table S1. Primer sequences used for quantitative RT-PCR reactions.

| Gene symbol    | Forward primer sequence | Reverse primer sequence    |
|----------------|-------------------------|----------------------------|
| TLR2           | CAGCTGGAGAACTCTGACCC    | CAAAGAGCCTGAAGTGGGAG       |
| TLR4           | CAACATCATCCAGGAAGGC     | GAAGGCGATACAATTCCACC       |
| iNOS           | ATGTCCGAAGCAAACATCAC    | TAATGTCCAGGAAGTAGGTG       |
| COCX2          | CAGCAAATCCTTGCTGTTCC    | TGGGCAAAGAATGCAAACATC      |
| TNF- $\alpha$  | GATCGGTCCCCAAAGGGATG    | GGCTACAGGCTTGTCACCTG       |
| IL-1 $\beta$   | TTCATCTTTGAAGAAGAGCCCAT | TCGGAGCCTGTAGTGCAGTT       |
| IL-6           | TGGAAATGAGAAAAGAGTTGTGC | CCAGTTTGGTAGCATCCATCA      |
| IL-10          | TACTCGGCAAACCTAGTGCG    | GTGTCCCAACATTCATAATTGTCAGT |
| $\beta$ -actin | TCAGCAAGCAGGAGTACGATG   | AACGCAGCTCAGTAACAGTCC      |
